# Supplementary material for: Rapid and Automated Method for Detecting and Quantifying Adulterations in High-Quality Honey Using Vis-NIRs in Combination with Machine Learning
Source: MDPI journal article supplement (doi:10.3390/foods12132491), 2023-06-26
Supplement: s1 [file s1]

**Table S1:** Correlation between Cophenetic distance and distance matrix for different HCA clustering methods using the NIR spectrum (with first derivative and Savitzky-Golay filter) of all honey samples (D<sub>70x4190</sub>).

| Linkage method | Cophenetic distance |
|----------------|---------------------|
| Single         | 0.8721              |
| Complete       | 0.8853              |
| Average        | 0.8279              |
| Ward           | 0.9053              |
| Centroid       | 0.8778              |
